# Supplementary material for: Parkinson Network Eastern Saxony (PANOS): Reaching Consensus for a Regional Intersectoral Integrated Care Concept for Patients with Parkinson’s Disease in the Region of Eastern Saxony, Germany
Source: PubMed Central journal article supplement (PMC7563971; doi:10.3390/jcm9092906), 2020-09-08
Supplement: jcm-09-02906-s001.pdf [file jcm-09-02906-s001.pdf]

1 **Supplementary Materials**  
2 **Parkinson Network Eastern Saxony (PANOS):**  
3 **Reaching Consensus for a Regional Intersectoral**  
4 **Integrated Care Concept for Patients with**  
5 **Parkinson's Disease in the Region of Eastern Saxony,**  
6 **Germany**

7 Kai F. Loewenbrück<sup>1,2,\*</sup>, Doron B. Stein<sup>3</sup>, Volker E. Amelung<sup>3</sup>, Robert Bitterlich<sup>1</sup>, Martin  
8 Brumme<sup>3</sup>, Björn Falkenburger<sup>1,2</sup>, Annekathrin Fehre<sup>6</sup>, Tim Feige<sup>1</sup>, Anika Frank<sup>1,2</sup>, Carola Gißke<sup>5</sup>,  
9 Claudia Helmert<sup>4</sup>, Linda Kerkemeyer<sup>3</sup>, Andreas Knapp<sup>4</sup>, Caroline Lang<sup>4</sup>, Annegret Leuner<sup>6</sup>,  
10 Carina Lummer<sup>3</sup>, Mirella M.N. Minkman<sup>9,10</sup>, Gabriele Müller<sup>4</sup>, Marlena van Munster<sup>7</sup>, Hannes  
11 Schlieter<sup>5</sup>, Peter Themann<sup>8</sup>, Nick Zonneveld<sup>9,10</sup>, Martin Wolz<sup>6</sup>

12 <sup>1</sup> Department of Neurology, University Hospital Dresden, 01307 Dresden, Germany;

13 [kai.loewenbrueck@uniklinikum-dresden.de](mailto:kai.loewenbrueck@uniklinikum-dresden.de)

14 <sup>2</sup> German Center for Neurodegenerative Diseases (DZNE) Dresden, 01307 Dresden, Germany;

15 <sup>3</sup> Institute for Applied Health Services Research (inav), Schiffbauerdamm 12, 10117 Berlin, Germany;

16 [stein@inav-berlin.de](mailto:stein@inav-berlin.de)

17 <sup>4</sup> Center for Evidence-based Healthcare, Faculty of Medicine Carl Gustav Carus, Technische Universität  
18 Dresden, Germany, [caroline.lang@uniklinikum-dresden.de](mailto:caroline.lang@uniklinikum-dresden.de)

19 <sup>5</sup> Chair of Wirtschaftsinformatik, Especially Systems Development, Faculty of Business and Economics,  
20 Technical University of Dresden, 01062 Dresden, Germany, [bjoern.falkenburger@uniklinikum-dresden.de](mailto:bjoern.falkenburger@uniklinikum-dresden.de)

21 <sup>6</sup> Department of Neurology, Elblandklinikum Meißen, 01662 Meißen, Germany;

22 [martin.wolz@elblandkliniken.de](mailto:martin.wolz@elblandkliniken.de)

23 <sup>7</sup> Department of Neurology, University Hospital Marburg, Marburg, Germany; [munster@med.uni-](mailto:munster@med.uni-marburg.de)  
24 [marburg.de](mailto:munster@med.uni-marburg.de)

25 <sup>8</sup> Department of Neurology, Klinik am Tharandter Wald Hetzdorf, Herzogswalder Straße 1, 09633  
26 Halsbrücke, Germany, [themann@reha-hetzdorf.de](mailto:themann@reha-hetzdorf.de)

27 <sup>9</sup> Vilans, National Centre of Expertise in Long Term Care, Utrecht, The Netherlands, [m.minkman@vilans.nl](mailto:m.minkman@vilans.nl)

28 <sup>10</sup> Tilburg University / TIAS School for Business and Society, Tilburg, the Netherlands

29

30 \* Correspondence: [kai.loewenbrueck@uniklinikum-dresden.de](mailto:kai.loewenbrueck@uniklinikum-dresden.de); Tel.: +49 351 458 18518 (K.F.L)

31 Received: 31/07/2020; Accepted: date; Published: date

32

33 **Supplementary Materials**

34 **Supplementary table:**

35 **Table S1:** Questions and items of online surveys

36

37

38

39

40

41

42

**Table S1:** Questions and items of online surveys

| <i>General questions on demographic and care structure of the target region</i>           |                                                                                                                             |                  |             |                  |              |            |
|-------------------------------------------------------------------------------------------|-----------------------------------------------------------------------------------------------------------------------------|------------------|-------------|------------------|--------------|------------|
| Question                                                                                  |                                                                                                                             | General Medicine |             | Neurology        |              |            |
| What medical specialty do you represent?                                                  |                                                                                                                             | 67%              |             | 33%              |              |            |
| Question                                                                                  |                                                                                                                             | >30              | 16-30       | 5--15            | <5           |            |
| How many PD patients schedule consultations with you every quarter year?                  |                                                                                                                             | 16%              | 16%         | 52%              | 16%          |            |
| Question                                                                                  |                                                                                                                             | Metropolis       |             | Small town       | Rural area   |            |
| How would you characterize the geographic location of your practise?                      |                                                                                                                             | 33%              |             | 33%              | 33%          |            |
| Question                                                                                  | Item                                                                                                                        | Good             | Rather good | Rather bad       | Bad          | Don't know |
| How would you rate care for PD patients in your region?                                   | Care by GPs                                                                                                                 | 24%              | 42%         | 24%              | 0%           | 9%         |
|                                                                                           | Care by outpatient specialists                                                                                              | 24%              | 39%         | 18%              | 18%          | 0%         |
| Question                                                                                  | Item                                                                                                                        | Fully agree      | Agree       | Moderately agree | Do not agree | Don't know |
| Which statement on the care of PD patients would you agree with?                          | Care is predominantly provided in accordance with guidelines                                                                | 12%              | 61%         | 6%               | 6%           | 15%        |
|                                                                                           | Timely referral to specialists                                                                                              | 15%              | 45%         | 27%              | 6%           | 6%         |
|                                                                                           | Patients are treated intersectorally                                                                                        | 6%               | 33%         | 27%              | 15%          | 18%        |
|                                                                                           | Patients receive individually required treatment                                                                            | 9%               | 45%         | 27%              | 9%           | 9%         |
|                                                                                           | PD patients often receive insufficient or incorrect care                                                                    | 6%               | 33%         | 33%              | 12%          | 12%        |
| Question                                                                                  | Item                                                                                                                        | Very large       | Large       | Moderate         | None         | Don't know |
| What challenges do you perceive in daily usual care reality?                              | Barriers regarding timely access to specialists                                                                             | 18%              | 30%         | 36%              | 9%           | 6%         |
|                                                                                           | Insufficient education and / or insufficient sensitisation of nursing staff                                                 | 12%              | 33%         | 36%              | 9%           | 9%         |
|                                                                                           | Lack of structured support material (specific and updated information and recommendations for the treatment of PD patients) | 6%               | 27%         | 36%              | 15%          | 15%        |
|                                                                                           | Unstructured coordination of treatment                                                                                      | 6%               | 27%         | 33%              | 21%          | 9%         |
|                                                                                           | Lack of communication, resp. lack of exchange with other physicians and therapists                                          | 6%               | 39%         | 30%              | 15%          | 6%         |
|                                                                                           | Lack of digital components in the care concept (EPR, Apps, etc.)                                                            | 9%               | 39%         | 9%               | 21%          | 18%        |
|                                                                                           | Lack of telemedical approaches in usual care                                                                                | 6%               | 30%         | 15%              | 24%          | 21%        |
| <i>Motivation of participants</i>                                                         |                                                                                                                             |                  |             |                  |              |            |
| Question                                                                                  | Item                                                                                                                        | Very much        | Much        | A little bit     | Not at all   | Don't know |
| How much would the following items motivate you personally to participate in the network? | Rising demand among patients                                                                                                | 6%               | 36%         | 36%              | 18%          | 3%         |
|                                                                                           | Availability of a structured care pathway                                                                                   | 27%              | 48%         | 9%               | 12%          | 3%         |
|                                                                                           | Support by case managers                                                                                                    | 6%               | 42%         | 24%              | 24%          | 0%         |
|                                                                                           | Adequate offer of therapies                                                                                                 | 24%              | 55%         | 9%               | 12%          | 0%         |
|                                                                                           | Advanced training curricula (for doctors, therapists and nurses)                                                            | 9%               | 45%         | 30%              | 6%           | 3%         |
|                                                                                           | Education curricula for patients and their relatives                                                                        | 9%               | 58%         | 12%              | 15%          | 6%         |
|                                                                                           | Networking with other healthcare service providers                                                                          | 27%              | 42%         | 12%              | 15%          | 0%         |
|                                                                                           | Electronic Health Record                                                                                                    | 6%               | 15%         | 30%              | 39%          | 6%         |
|                                                                                           | Availability of the results of repetitive patient self-monitoring                                                           | 3%               | 30%         | 30%              | 18%          | 15%        |

|                                          |     |     |     |     |     |
|------------------------------------------|-----|-----|-----|-----|-----|
| Telemedical offers                       | 3%  | 9%  | 36% | 30% | 18% |
| Adequate reimbursement                   | 12% | 33% | 36% | 12% | 6%  |
| Adequate (human and technical) resources | 18% | 45% | 27% | 6%  | 3%  |

### Importance of different care aspects

| Question                                                                                                                                | Item                                                                                                                    | 5 (relevant)       | 4        | 3        | 2        | 1 (irrelevant)                | Cannot judge        | No answer        |
|-----------------------------------------------------------------------------------------------------------------------------------------|-------------------------------------------------------------------------------------------------------------------------|--------------------|----------|----------|----------|-------------------------------|---------------------|------------------|
| <b>Which of the following dimensions do you consider to be generally relevant for PD treatment?</b>                                     | General health related quality of life                                                                                  | 59%                | 18%      | 18%      | 0%       | 0%                            | 0%                  | 0%               |
|                                                                                                                                         | PD-specific quality of life                                                                                             | 64%                | 23%      | 9%       | 0%       | 0%                            | 0%                  | 0%               |
|                                                                                                                                         | Motor function (e.g. gait insecurity, falls, voice)                                                                     | 64%                | 27%      | 5%       | 0%       | 0%                            | 0%                  | 0%               |
|                                                                                                                                         | Non-motor function (e.g. sleep, sexual function)                                                                        | 18%                | 41%      | 36%      | 0%       | 0%                            | 0%                  | 0%               |
|                                                                                                                                         | Cognitive function (e.g. memory, weak concentration, perceptual disorder)                                               | 32%                | 50%      | 14%      | 0%       | 0%                            | 0%                  | 0%               |
|                                                                                                                                         | Emotional function (e.g. depression, anxiety, mood, impulse control disorder)                                           | 41%                | 41%      | 14%      | 0%       | 0%                            | 0%                  | 0%               |
|                                                                                                                                         | Social function (e.g. aggression, social participation)                                                                 | 32%                | 36%      | 27%      | 0%       | 0%                            | 0%                  | 0%               |
|                                                                                                                                         | Role function (e.g. occupation, parental role)                                                                          | 18%                | 23%      | 50%      | 5%       | 0%                            | 0%                  | 0%               |
|                                                                                                                                         | Pain                                                                                                                    | 45%                | 41%      | 5%       | 5%       | 0%                            | 0%                  | 0%               |
|                                                                                                                                         | Adverse drug events                                                                                                     | 41%                | 36%      | 14%      | 5%       | 0%                            | 0%                  | 0%               |
| <b>How important do you rate the following general contents of PANOS?</b>                                                               | Performance of a social and nursing assessment by the case manager twice a year                                         |                    |          | 0%       | 10%      | 70%                           | 20%                 | 0%               |
|                                                                                                                                         | Home visit (after registration to PANOS) by the case manager to patients/their family                                   |                    |          | 0%       | 20%      | 50%                           | 30%                 | 0%               |
|                                                                                                                                         | Coordination and management of patients' appointments with GPs and neurologists by the case manager                     |                    |          | 0%       | 0%       | 50%                           | 30%                 | 20%              |
|                                                                                                                                         | Ability for the GPs and neurologists to request services from case managers via the electronic PANOS platform           |                    |          | 10%      | 40%      | 50%                           | 0%                  | 0%               |
|                                                                                                                                         | Performance of tests (e.g. MOCA, UPDRS, etc.) by case managers                                                          |                    |          | 10%      | 10%      | 60%                           | 20%                 | 0%               |
|                                                                                                                                         | Having a permanent personal contact person in the case managers regarding GPs' and neurologists' collaboration in PANOS |                    |          | 30%      | 20%      | 30%                           | 0%                  | 0%               |
|                                                                                                                                         | Regular surveys among GPs and neurologists by case managers on the satisfaction of cooperation within PANOS             |                    |          | 20%      | 10%      | 20%                           | 30%                 | 10%              |
|                                                                                                                                         | Possibility of the case manager being the central contact person for patients and relatives                             |                    |          | 0%       | 20%      | 50%                           | 10%                 | 10%              |
| <b>Question</b>                                                                                                                         | <b>Item</b>                                                                                                             | <b>5 (willing)</b> | <b>4</b> | <b>3</b> | <b>2</b> | <b>1 (not willing at all)</b> | <b>Cannot judge</b> | <b>No answer</b> |
| <b>Which of the following dimensions would you be willing to survey and record in a structured way in the context of your own work?</b> | General health related quality of life                                                                                  | 36%                | 18%      | 23%      | 5%       | 5%                            | 9%                  | 5%               |
|                                                                                                                                         | PD-specific quality of life                                                                                             | 36%                | 41%      | 9%       | 5%       | 0%                            | 5%                  | 5%               |
|                                                                                                                                         | Motor function (e.g. gait insecurity, falls, voice)                                                                     | 50%                | 18%      | 18%      | 5%       | 0%                            | 5%                  | 5%               |
|                                                                                                                                         | Non-motor function (e.g. sleep, sexual function)                                                                        | 32%                | 23%      | 18%      | 18%      | 0%                            | 5%                  | 5%               |
|                                                                                                                                         | Emotional function (e.g. depression, anxiety, mood, impulse control disorder)                                           | 27%                | 41%      | 14%      | 5%       | 5%                            | 5%                  | 5%               |
|                                                                                                                                         | Social function (e.g. aggression, social participation)                                                                 | 27%                | 23%      | 23%      | 14%      | 5%                            | 5%                  | 5%               |

|                                                |     |     |     |     |    |    |    |
|------------------------------------------------|-----|-----|-----|-----|----|----|----|
| Role function (e.g. occupation, parental role) | 18% | 18% | 27% | 23% | 5% | 5% | 5% |
| Pain                                           | 36% | 32% | 14% | 9%  | 0% | 5% | 5% |
| Adverse drug events                            | 41% | 32% | 14% | 5%  | 0% | 5% | 5% |

### Electronic Health Record

| Question                                                                                 | Item                                                                                    | essential     | Im-<br>por-<br>tant | optional | not<br>impor-<br>tant | irrelevant   | Cannot<br>judge | No<br>answer |
|------------------------------------------------------------------------------------------|-----------------------------------------------------------------------------------------|---------------|---------------------|----------|-----------------------|--------------|-----------------|--------------|
| What information about PD patients should be provided in the EHR?                        | Medication plan                                                                         | 82%           | 14%                 | 0%       | 0%                    | 0%           | 0%              | 5%           |
|                                                                                          | Diagnostic reports (e.g. discharge letters, neuro-imaging-reports)                      | 41%           | 50%                 | 5%       | 0%                    | 0%           | 0%              | 5%           |
|                                                                                          | Medical history reports (e.g. comorbidities, allergies, family)                         | 50%           | 36%                 | 9%       | 0%                    | 0%           | 0%              | 5%           |
|                                                                                          | Social history and care situation at home (e.g. problems at home, long-term care level) | 32%           | 50%                 | 14%      | 0%                    | 0%           | 0%              | 5%           |
|                                                                                          | Vital signs                                                                             | 5%            | 55%                 | 32%      | 5%                    | 0%           | 0%              | 5%           |
|                                                                                          | Laboratory results                                                                      | 9%            | 45%                 | 41%      | 0%                    | 0%           | 0%              | 5%           |
|                                                                                          | Clinical scales / scores                                                                | 9%            | 36%                 | 45%      | 5%                    | 0%           | 0%              | 5%           |
|                                                                                          | Structured self-assessment questionnaires (e.g. BDI-II or UPDRS)                        | 0%            | 41%                 | 50%      | 5%                    | 0%           | 0%              | 5%           |
| What functions should be provided in the EHR?                                            | Other contents                                                                          | 5%            | 9%                  | 23%      | 9%                    | 9%           | 0%              | 45%          |
|                                                                                          | Platform Function: Interactive Calendar for scheduling appointments                     | 14%           | 27%                 | 45%      | 0%                    | 9%           | 0%              | 5%           |
|                                                                                          | Platform Function: Secured internal messaging system                                    | 23%           | 55%                 | 18%      | 0%                    | 0%           | 0%              | 5%           |
|                                                                                          | Platform Function: DICOM-Viewer for radiological and nuclear medical image data         | 0%            | 18%                 | 68%      | 9%                    | 0%           | 0%              | 5%           |
|                                                                                          | Platform Function: Electronic interface for the use of clinical scales/scores           | 5%            | 59%                 | 27%      | 5%                    | 0%           | 0%              | 5%           |
| Platform Function: Other                                                                 | 0%                                                                                      | 0%            | 23%                 | 9%       | 5%                    | 0%           | 64%             |              |
| Question                                                                                 | Item                                                                                    | 5<br>(Always) | 4                   | 3        | 2                     | 1<br>(Never) | Cannot<br>judge | No<br>answer |
| Have you ever used tools for structured reporting in the context of PD?                  |                                                                                         | 0%            | 14%                 | 14%      | 5%                    | 64%          | 0%              | 5%           |
| Can you imagine using tools for structured reporting in the context of PD in the future? |                                                                                         | 18%           | 59%                 | 9%       | 9%                    | 0%           | 0%              | 5%           |

### Patient self-management education program

| Question                                                                                                    | Item                                                                        | Extremely<br>important | Very<br>impor-<br>tant | Moderately<br>important | Little<br>impor-<br>tant | Not<br>impor-<br>tant |
|-------------------------------------------------------------------------------------------------------------|-----------------------------------------------------------------------------|------------------------|------------------------|-------------------------|--------------------------|-----------------------|
| How important do you rate the following contents of a structured patient self-management education program? | Knowledge about adverse drug events                                         | 30%                    | 50%                    | 20%                     | 0%                       | 0%                    |
|                                                                                                             | Knowledge about drug mechanisms and effects                                 | 20%                    | 60%                    | 20%                     | 0%                       | 0%                    |
|                                                                                                             | Strengthening of well-being                                                 | 20%                    | 50%                    | 30%                     | 0%                       | 0%                    |
|                                                                                                             | Coping with anxiety                                                         | 20%                    | 40%                    | 40%                     | 0%                       | 0%                    |
|                                                                                                             | Coping with depression                                                      | 20%                    | 40%                    | 40%                     | 0%                       | 0%                    |
|                                                                                                             | Promotion of social support                                                 | 20%                    | 40%                    | 40%                     | 0%                       | 0%                    |
|                                                                                                             | Strengthening of social competence                                          | 20%                    | 10%                    | 70%                     | 0%                       | 0%                    |
|                                                                                                             | Knowledge about the origin of the disease                                   | 10%                    | 50%                    | 40%                     | 0%                       | 0%                    |
|                                                                                                             | Coping with stress                                                          | 10%                    | 40%                    | 50%                     | 0%                       | 0%                    |
|                                                                                                             | Knowledge about complex therapies (deep brain stimulation, medication pump) | 10%                    | 30%                    | 60%                     | 0%                       | 0%                    |
| Ability of self-observation and introspection                                                               | 0%                                                                          | 80%                    | 20%                    | 0%                      | 0%                       |                       |

|                                                                                                                                        |                                                |     |     |     |     |     |
|----------------------------------------------------------------------------------------------------------------------------------------|------------------------------------------------|-----|-----|-----|-----|-----|
| <b>How important are the following goals of the structured patient self-management education program for the referral of a patient</b> | Improvement of physician-patient communication | 22% | 22% | 11% | 33% | 11% |
|                                                                                                                                        | Strengthening of health-promoting behavior     | 22% | 22% | 55% | 0%  | 0%  |
|                                                                                                                                        | Improvement of emotional well-being            | 11% | 22% | 44% | 22% | 0%  |
| <b>How important do you find the availability of a separate training session for caregiving relatives?</b>                             | Relief of physical symptoms                    | 33% | 33% | 33% | 0%  | 0%  |
|                                                                                                                                        |                                                | 30% | 60% | 10% | 0%  | 0%  |

**Structured professional continuous education program**

| Question                                                                                                              | Item                                                 | Annually            | Twice per year | Every quarter        | No answer        |               |
|-----------------------------------------------------------------------------------------------------------------------|------------------------------------------------------|---------------------|----------------|----------------------|------------------|---------------|
| How often should Parkinson-specific training courses be offered as part of PANOS?                                     |                                                      | 27%                 | 59%            | 9%                   | 5%               |               |
| Question                                                                                                              | Item                                                 | Extremely important | Very important | Moderately important | Little important | Not important |
| <b>How important do you rate the following contents of a structured professional continuous education curriculum?</b> | General PANOS program structure                      | 20%                 | 0%             | 40%                  | 30%              | 10%           |
|                                                                                                                       | PANOS integrated care pathway                        | 20%                 | 10%            | 40%                  | 30%              | 0%            |
|                                                                                                                       | PANOS case managers                                  | 20%                 | 30%            | 20%                  | 20%              | 10%           |
|                                                                                                                       | Structured patient self-management education program | 30%                 | 20%            | 40%                  | 10%              | 0%            |
|                                                                                                                       | Structured education program for relatives           | 20%                 | 30%            | 30%                  | 20%              | 0%            |
|                                                                                                                       | Electronic Health Record                             | 20%                 | 10%            | 30%                  | 40%              | 0%            |
|                                                                                                                       | Data security                                        | 40%                 | 10%            | 20%                  | 20%              | 10%           |
|                                                                                                                       | Care structures                                      | 20%                 | 30%            | 20%                  | 30%              | 0%            |
|                                                                                                                       | General case management                              | 10%                 | 10%            | 60%                  | 20%              | 0%            |
|                                                                                                                       | General medical aspects of PD                        | 10%                 | 50%            | 30%                  | 10%              | 0%            |
|                                                                                                                       | Societal impact of PD                                | 10%                 | 10%            | 50%                  | 20%              | 10%           |
|                                                                                                                       | Epidemiology                                         | 0%                  | 20%            | 50%                  | 30%              | 0%            |
|                                                                                                                       | Neurobiology                                         | 0%                  | 30%            | 60%                  | 10%              | 0%            |
|                                                                                                                       | Genetics                                             | 0%                  | 50%            | 40%                  | 10%              | 0%            |
|                                                                                                                       | Diagnostics                                          | 10%                 | 40%            | 40%                  | 10%              | 0%            |
|                                                                                                                       | Therapy                                              | 20%                 | 50%            | 20%                  | 10%              | 0%            |
|                                                                                                                       | Drug therapy                                         | 20%                 | 30%            | 40%                  | 10%              | 0%            |
|                                                                                                                       | Adverse events & Drug interaction                    | 20%                 | 10%            | 60%                  | 10%              | 0%            |
|                                                                                                                       | Sensor technology for use with PD                    | 0%                  | 20%            | 50%                  | 30%              | 0%            |
|                                                                                                                       | Rehabilitation programs for PD patients              | 10%                 | 50%            | 30%                  | 10%              | 0%            |
|                                                                                                                       | General comorbidities                                | 0%                  | 40%            | 50%                  | 10%              | 0%            |
|                                                                                                                       | Internistic comorbidities                            | 10%                 | 70%            | 10%                  | 10%              | 0%            |
|                                                                                                                       | Psychiatric comorbidities                            | 10%                 | 40%            | 40%                  | 10%              | 0%            |
|                                                                                                                       | Psychosocial support                                 | 10%                 | 40%            | 40%                  | 10%              | 0%            |
|                                                                                                                       | Psychotherapy                                        | 10%                 | 10%            | 30%                  | 40%              | 0%            |
|                                                                                                                       | Sociotherapy                                         | 10%                 | 20%            | 50%                  | 20%              | 0%            |
|                                                                                                                       | Self-help                                            | 20%                 | 10%            | 60%                  | 10%              | 0%            |
| Occupational therapy                                                                                                  | 20%                                                  | 50%                 | 20%            | 10%                  | 0%               |               |
| Physiotherapy                                                                                                         | 30%                                                  | 40%                 | 20%            | 10%                  | 0%               |               |
| Speech therapy                                                                                                        | 30%                                                  | 40%                 | 20%            | 10%                  | 0%               |               |
| Foster care for PD patients                                                                                           | 20%                                                  | 10%                 | 50%            | 10%                  | 0%               |               |
| Motor complications                                                                                                   | 10%                                                  | 40%                 | 40%            | 10%                  | 0%               |               |

| Question                                                                       | Item                                                                        | Selected by |
|--------------------------------------------------------------------------------|-----------------------------------------------------------------------------|-------------|
| <b>What are your preferred training formats (multiple selection possible)?</b> | Personal information events with workshop character                         | 40%         |
|                                                                                | Online training, E-learning formats (self-study courses)                    | 40%         |
|                                                                                | Online trainings (live with speakers)                                       | 50%         |
|                                                                                | Classroom training                                                          | 60%         |
|                                                                                | Case studies                                                                | 50%         |
|                                                                                | Advanced trainings during the meetings of existing regional quality circles | 20%         |
|                                                                                | Regional training courses in a new PANOS-specific format                    | 50%         |
|                                                                                | Central training courses (e.g. in PD centers)                               | 40%         |

### Information on the program

| Question                                                                                                          | Item                                    | Selected by |
|-------------------------------------------------------------------------------------------------------------------|-----------------------------------------|-------------|
| <b>How would you like to be informed about current developments in the project (multiple selection possible)?</b> | Collaborative platforms like Confluence | 0%          |
|                                                                                                                   | Print-Newsletters                       | 20%         |
|                                                                                                                   | PANOS-Website                           | 40%         |
|                                                                                                                   | Regular information events              | 50%         |
|                                                                                                                   | E-Mail-Newsletters                      | 80%         |

### Miscellaneous

| Question                                                                                                                                                          | Item | Yes | No  | Cannot judge | No answer |
|-------------------------------------------------------------------------------------------------------------------------------------------------------------------|------|-----|-----|--------------|-----------|
| Did you take part in the 1st PANOS Workshop on 29.01.2020?                                                                                                        |      | 55% | 45% | 0%           | 0         |
| Are you registered for the 2nd PANOS Workshop (11.03.2020) or do you plan to participate?                                                                         |      | 68% | 27% | 0%           | 5%        |
| Are you registered for the 3rd PANOS Workshop (22.04.2020) or do you plan to participate?                                                                         |      | 68% | 18% | 0%           | 14%       |
| Do you consider it sufficient to be able to contact a specialist via the internal messaging system of the PANOS platform in case of emergencies or uncertainties? |      | 77% | 18% | 0%           | 5%        |
| Would it be generally practicable for you if the PANOS users involved were to communicate via the internal PANOS news platform?                                   |      | 86% | 9%  | 0%           | 5%        |

44

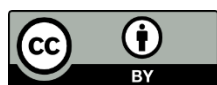

© 2020 by the authors. Submitted for possible open access publication under the terms and conditions of the Creative Commons Attribution (CC BY) license (<http://creativecommons.org/licenses/by/4.0/>).

45
